# Supplementary material for: An RNase H-powered DNA walking machine for sensitive detection of RNase H and the screening of related inhibitors
Source: Royal Society of Chemistry journal article supplement (doi:10.1039/c9nr07550j), 2019-12-04
Supplement: c9nr07550j1.pdf [file c9nr07550j1.pdf]

## **Electronic Supplementary Information (ESI)**

### **An RNase H-powered DNA walking machine for sensitive detection of RNase H and the screening of related inhibitors**

Yafang Wang, Namin Hu, Chang Liu, Cunpeng Nie, Manman He, Juan  
Zhang, Qiaoqin Yu, Chuan Zhao, Tingting Chen\* and Xia Chu\*

State Key Laboratory of Chemo/Bio-Sensing and Chemometrics, College of  
Chemistry and Chemical Engineering, Hunan University, Changsha 410082, P. R.  
China

E-mail: [xiachu@hnu.edu.cn](mailto:xiachu@hnu.edu.cn); [chenting1104@hnu.edu.cn](mailto:chenting1104@hnu.edu.cn)

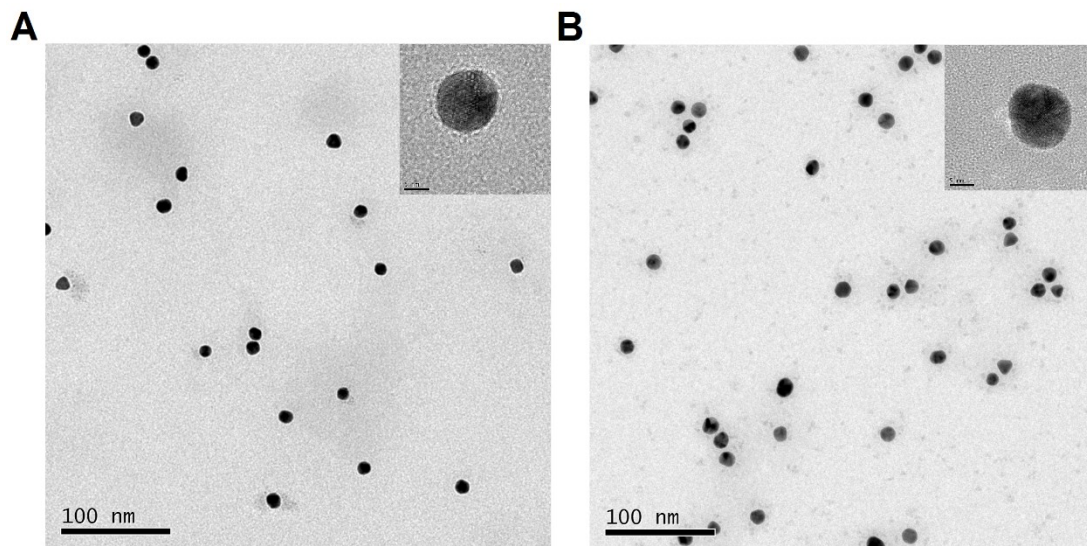

**Fig. S1** Transmission electron microscopy images of the bare AuNPs (A) and the DNA-RNA chimeric strands functionalized AuNPs (B).

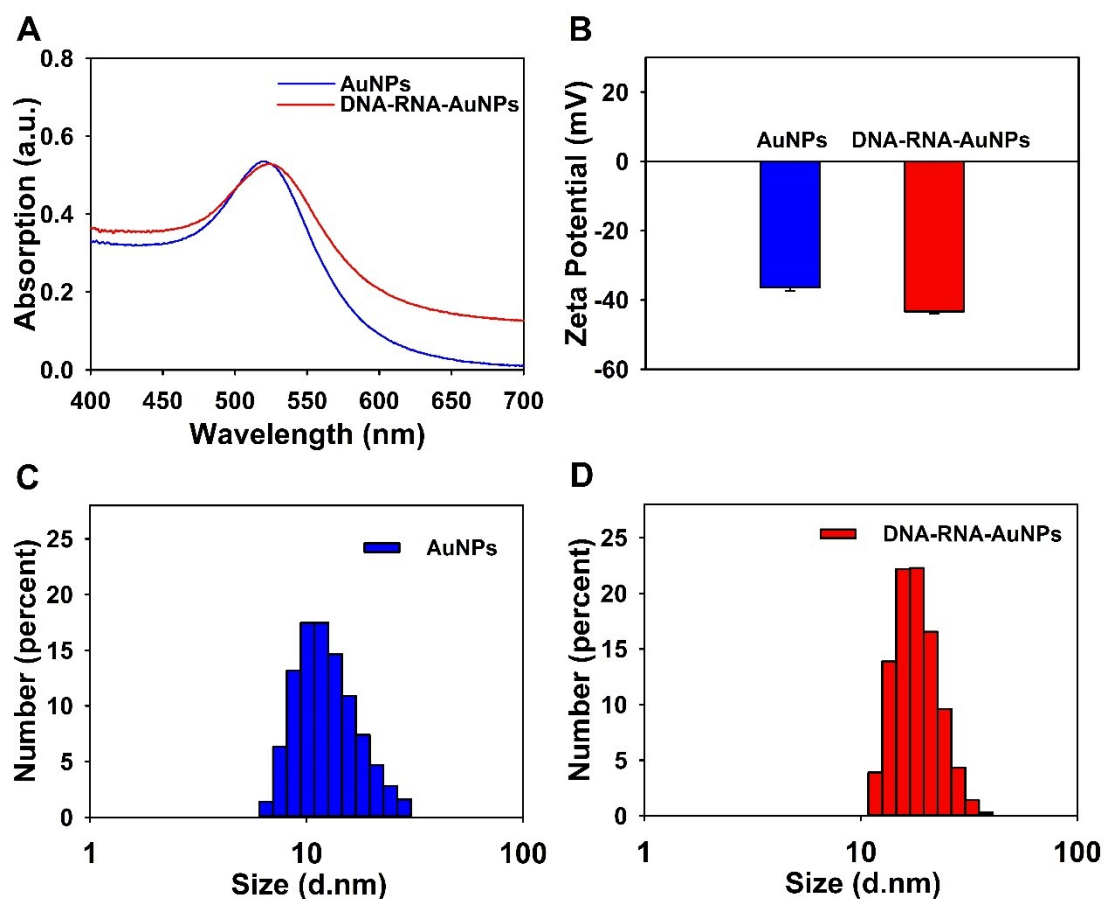

**Fig. S2** (A) UV-vis absorption spectra of bare AuNPs (blue) and DNA-RNA chimeric strands functionalized AuNPs (red). (B) Zeta potential of bare AuNPs (blue) and DNA-RNA chimeric strands functionalized AuNPs (red). Dynamic light scattering (DLS) measurements of bare AuNPs (C) and DNA-RNA chimeric strands functionalized AuNPs (D).

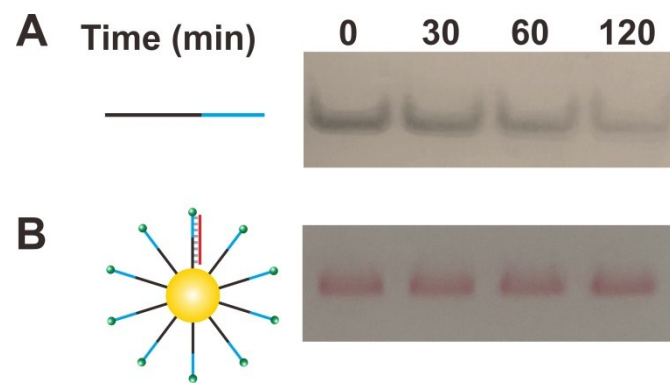

**Fig. S3** Degradation analysis of the DNA-RNA chimeric strand (A) and DNA walking machine (B) against DNase I.

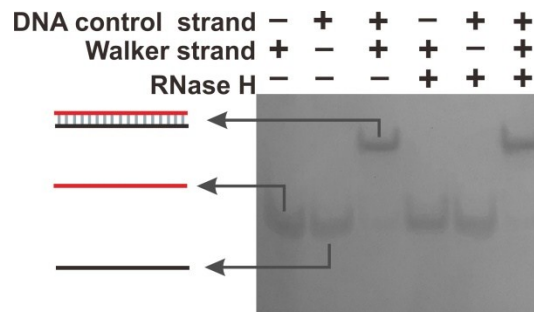

**Fig. S4** Polyacrylamide gel electrophoresis image of DNA walker strand, DNA control strand and DNA hybrid strands in response to RNase H.

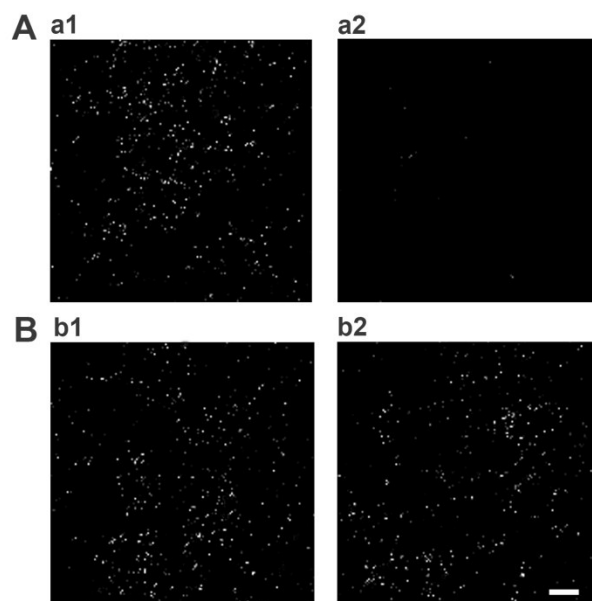

**Fig. S5** TIRF images of different functionalized AuNPs. (A) The DNA walking machine in the absence (a1) or presence (a2) of RNase H. (B) The AuNPs conjugated with only DNA-RNA chimeric strands in the absence (b1) or presence (b2) of RNase H. Scale bar=3  $\mu\text{m}$ .

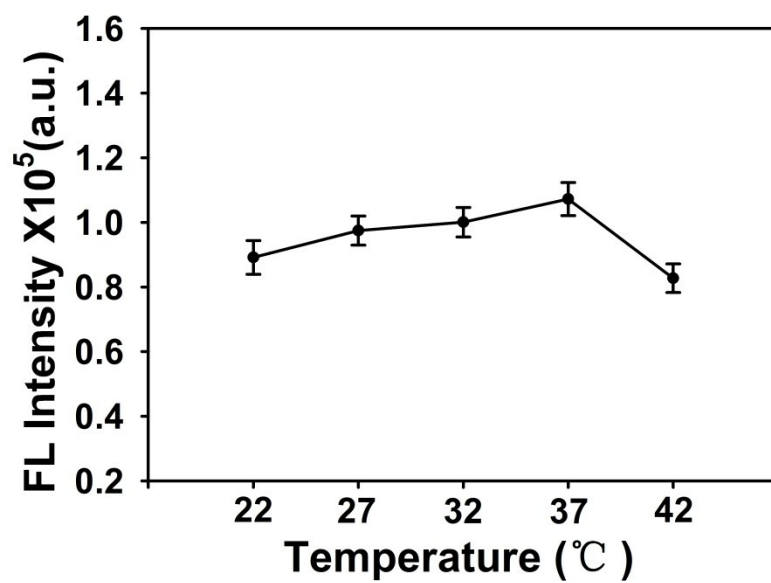

**Fig. S6** Optimization experiment of temperature on the operation of DNA walking machine. Error bars were calculated from three replicate measurements.

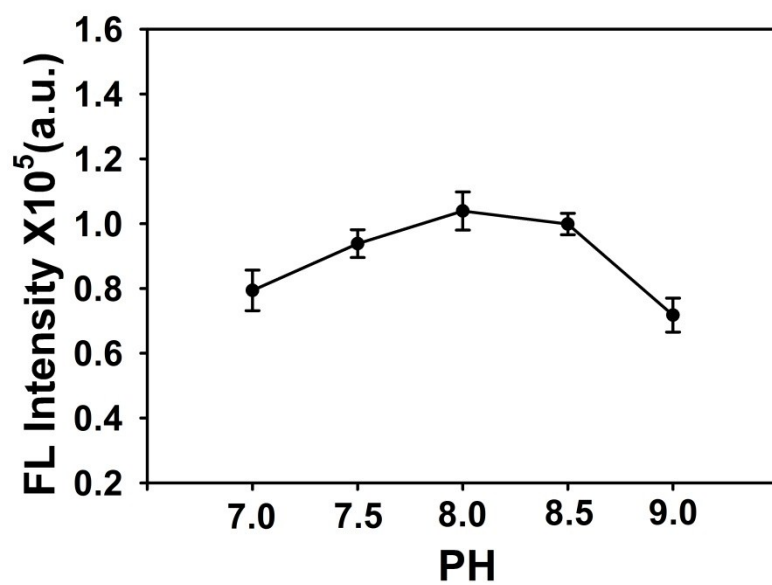

**Fig. S7** Optimization experiment of pH on the operation of DNA walking machine. Error bars were calculated from three replicate measurements.



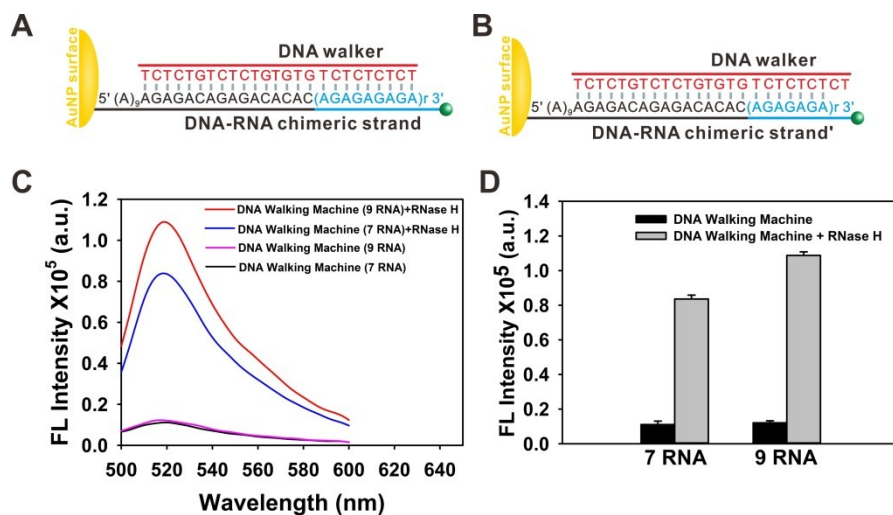

**Fig. S8** (A) Construction of DNA-RNA chimeric strand (9 nt RNA). (B) Construction of DNA-RNA chimeric strand (7 nt RNA). (C) Fluorescence spectra of DNA walking machine constructed by DNA-RNA chimeric strand (9 nt RNA) and DNA-RNA chimeric strand (7 nt RNA) in response to RNase H. (D) Fluorescence intensities versus varying length of RNA in DNA-RNA chimeric strand.

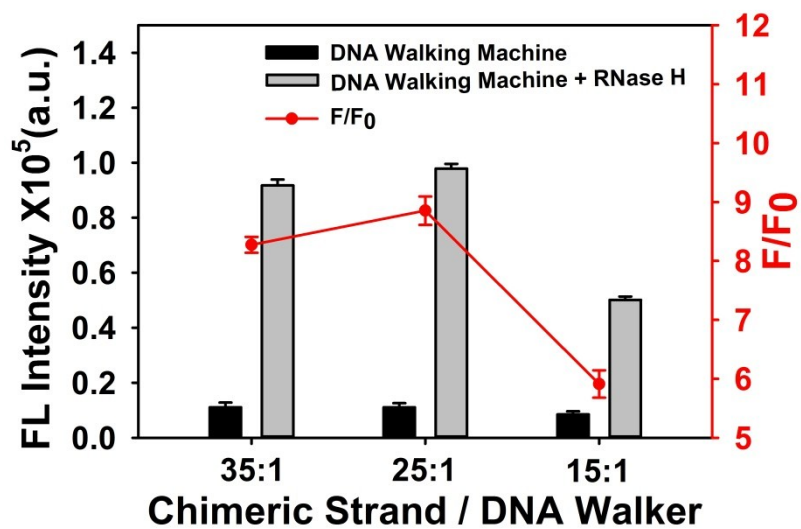

**Fig. S9** Optimization experiment of the molar ratio of two strands on the operation of DNA walking machine. Error bars were calculated from three replicate measurements.

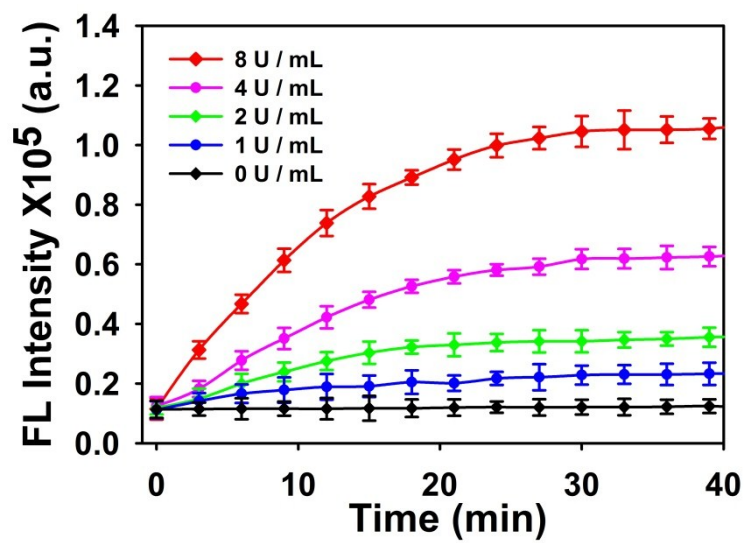

**Fig. S10** Optimization experiment of reaction time on the operation of DNA walking machine. Error bars were calculated from three replicate measurements.

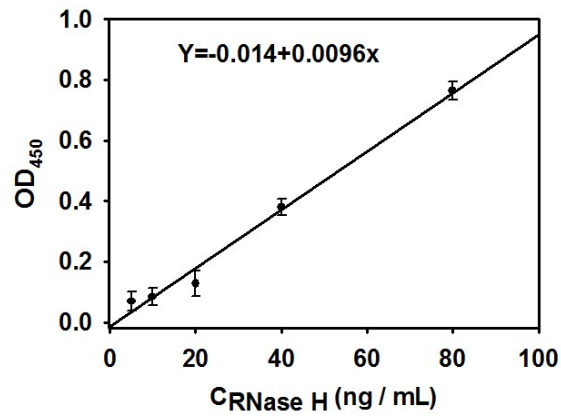

**Fig. S11** The working curve of the RNase H standard sample by using commercial RNase H ELISA kit. Error bars were calculated from three replicate measurements.

| <b>Methods</b>                                    | <b>Detection limit</b> | <b>Ref.</b> |
|---------------------------------------------------|------------------------|-------------|
| Gold nanoparticles                                | 27 U / mL              | 1           |
| Tb <sup>3+</sup> -induced G-quadruplex conjugates | 2 U / mL               | 2           |
| DNA tetrahedron based biosensor                   | 3.41 U / mL            | 3           |
| N-methyl mesoporphyrin IX                         | 0.2 U / mL             | 4           |
| Iridium(III) complexes                            | 0.125 U / mL           | 5           |

**Table S1.** Comparison of our analytical method with other reported methods for the detection of RNase H.

| Sample number | OD <sub>450</sub> | Mass concentration of RNase H (ng/mL) | Activity concentration of RNase H (U/mL) |
|---------------|-------------------|---------------------------------------|------------------------------------------|
| 1             | 0.238             | 26.25                                 | 1.05                                     |
| 2             | 0.227             | 25.10                                 | 1.00                                     |
| 3             | 0.223             | 24.69                                 | 0.99                                     |

1 unit of RNase H is 25 ng provided by the product manual.

**Table S2.** The detection results of the RNase H in 10% serum by using commercial RNase H ELISA kit. The concentration of the RNase H in 10% serum is  $1.01 \pm 0.03$  U/mL.

## References

1. X. Xie, W. Xu, T. Li and X. Liu, *Small*, 2011, **7**, 1393-1396.
2. K. Wu, C. Ma, H. Liu, H. He, W. Zeng and K. Wang, *Anal. Methods*, 2017, **9**, 3055-3060.
3. K. Zhang, W. Huang, Y. Huang, H. Li, K. Wang, X. Zhu and M. Xie, *Anal. Chem.*, 2019, **91**, 7086-7096.
4. D. Hu, F. Pu, Z. Huang, J. Ren and X. Qu, *Chem. Eur. J.*, 2010, **16**, 2605-2610.
5. L. Lu, W. Wang, C. Yang, T.S. Kang, C.H. Leung and D.L. Ma, *J. Mater. Chem. B*, 2016, **4**, 6791-6796.
